# Supplementary material for: A critical appraisal of computer vision in orthodontics
Source: Frontiers journal article supplement (doi:10.3389/frvir.2025.1652074), 2025-10-20
Supplement: Supplementary_file_1.xlsx [file Supplementary_file_1.xlsx]

## Sheet: Kepypoint Detector Upper Arch
Test\Keypoint	1	2	3	4	5	6	7	8	9	10	11	12	13	14	15
1
2
3
4
5
6
7
8
9
10
11
12
13
14
15
16
17
18
19
20
21
22
23
24
25
26
27
28
29
30
RMS	5.15208e-05

## Sheet: Kepypoint Detector Lower Arch
Keypoint	1	2	3	4	5	6	7	8	9	10	11	12	13	14	15
1
2
3
4
5
6
7
8
9
10
11
12
13
14
15
16
17
18
19
20
21
22
23
24
25
26
27
28
29
30
RMS	5.07084e-05

## Sheet: Spatial Frame
Trial	X	Y	Z	Rot X	Rot Y	Rot Z
1	-2.84	30.29	58.32	9.01	359.87	3.6
2	-2.84	30.4	58.3	9.01	359.86	3.59
3	-2.83	30.3	58.35	9.02	359.86	3.58
4	-2.86	30.27	58.33	9.03	359.86	3.57
5	-2.83	30.2	58.36	9.03	359.87	3.58
6	-2.84	30.2	58.36	9.04	359.86	3.58
7	-2.93	30.18	58.41	9.04	359.87	3.58
8	-2.84	30.19	58.42	9.03	359.86	3.59
9	-2.87	30.24	58.36	9.04	359.86	3.58
10	-2.88	30.21	58.34	9.04	359.87	3.58
11	-2.86	30.19	58.36	9.04	359.87	3.59
12	-2.87	30.2	58.38	9.05	359.87	3.59
13	-2.87	30.18	58.26	9.03	359.86	3.59
14	-2.79	30.21	58.22	9.06	359.88	3.64
15	-2.61	30.2	58.29	8.99	359.92	3.81
16	-2.62	30.06	57.98	8.98	359.91	3.71
17	-2.83	30.11	58.02	8.98	359.85	3.56
18	-2.65	30.11	58.04	8.98	359.9	3.7
19	-2.76	30.11	58.13	9.13	359.88	3.68
20	-2.76	30.26	58.22	9.14	359.89	3.67
21	-2.85	30.34	58.37	9.04	359.88	3.66
22	-2.79	30.37	58.23	8.96	359.89	3.67
23	-2.75	30.32	58.21	9.01	359.88	3.66
24	-2.67	30.19	58.07	9.05	359.87	3.64
25	-2.69	30.19	58.25	9.07	359.88	3.66
26	-2.8	30.17	58.3	9.05	359.88	3.66
27	-2.81	30.2	58.28	9.05	359.89	3.65
28	-2.82	30.22	58.37	9.06	359.89	3.67
29	-2.85	30.24	58.4	9.05	359.88	3.64
30	-2.89	30.26	58.37	9.02	359.85	3.58
31	-2.85	30.07	58.27	9.09	359.89	3.66
32	-2.78	30.19	58.32	9.07	359.9	3.7
33	-2.78	30.11	58.14	9.07	359.87	3.63
34	-2.78	30.24	58.25	9.09	359.89	3.65
Average	-2.80265	30.2124	58.2729	9.03971	359.877	3.63235
stdev	0.0773151	0.0787038	0.115798	0.0391953	0.0164631	0.0539954

## Sheet: Pose Estimation Upper Arch
Trial\Pose	X	Y	Z	Rot X	Rot Y	Rot Z	Normalized	X	Y	Z	Rot X	Rot Y	Rot Z
1	34.49	2.31	491.83	11.36	354.17	358.49		-0.489706	-0.204706	-5.29676	-0.328824	-0.990882	-0.303824
2	34.65	2.19	494.53	11.35	354.4	358.67		-0.329706	-0.324706	-2.59676	-0.338824	-0.760882	-0.123824
3	34.59	2.22	491.99	11.45	354.5	358.52		-0.389706	-0.294706	-5.13676	-0.238824	-0.660882	-0.273824
4	34.66	2.46	492.1	11.27	354.64	358.62		-0.319706	-0.0547059	-5.02676	-0.418824	-0.520882	-0.173824
5	34.86	2.37	493.85	11.52	355.71	358.96		-0.119706	-0.144706	-3.27676	-0.168824	0.549118	0.166176
6	35.25	2.09	495.31	12.06	355.92	358.86		0.270294	-0.424706	-1.81676	0.371176	0.759118	0.0661765
7	35.1	2.22	494.3	12.03	355.49	358.92		0.120294	-0.294706	-2.82676	0.341176	0.329118	0.126176
8	35.44	2.35	499.49	12.17	355.9	358.93		0.460294	-0.164706	2.36324	0.481176	0.739118	0.136176
9	35.43	2.31	498.61	12.26	355.83	359		0.450294	-0.204706	1.48324	0.571176	0.669118	0.206176
10	35.36	2.23	496.08	12.27	356.2	358.94		0.380294	-0.284706	-1.04676	0.581176	1.03912	0.146176
11	35.27	2.23	497.85	12.27	355.89	359.12		0.290294	-0.284706	0.723235	0.581176	0.729118	0.326176
12	35.1	2.35	496.73	11.94	355.43	359		0.120294	-0.164706	-0.396765	0.251176	0.269118	0.206176
13	35.06	2.24	496.38	11.99	355.19	358.99		0.0802941	-0.274706	-0.746765	0.301176	0.0291176	0.196176
14	34.87	2.51	497.04	11.29	356.17	359.14		-0.109706	-0.00470588	-0.0867647	-0.398824	1.00912	0.346176
15	34.81	2.29	499.35	11.4	354.13	358.94	*	-0.169706	-0.224706	2.22324	-0.288824	-1.03088	0.146176
16	36	3.04	510.74	12.68	352.86	358.21	*	1.02029	0.525294	13.6132	0.991176	-2.30088	-0.583824
17	36.56	3.02	516.32	12.53	354.82	358.23		1.58029	0.505294	19.1932	0.841176	-0.340882	-0.563824
18	34.69	3.19	498.07	11.87	353.06	358.56	*	-0.289706	0.675294	0.943235	0.181176	-2.10088	-0.233824
19	34.76	3.07	497.63	11.62	354.01	358.44	*	-0.219706	0.555294	0.503235	-0.0688235	-1.15088	-0.353824
20	34.84	2.57	495.66	11.27	355.15	358.73		-0.139706	0.0552941	-1.46676	-0.418824	-0.0108824	-0.0638235
21	34.49	2.25	493.26	11.29	354.6	358.68		-0.489706	-0.264706	-3.86676	-0.398824	-0.560882	-0.113824
22	34.97	2.7	497.16	10.92	356.15	358.99		-0.00970588	0.185294	0.0332353	-0.768824	0.989118	0.196176
23	34.66	2.79	493.5	10.57	356.26	358.87		-0.319706	0.275294	-3.62676	-1.11882	1.09912	0.0761765
24	34.36	3.06	496.02	11.26	354.58	358.61		-0.619706	0.545294	-1.10676	-0.428824	-0.580882	-0.183824
25	34.72	2.74	495.5	11.1	355.54	358.92		-0.259706	0.225294	-1.62676	-0.588824	0.379118	0.126176
26	34.94	2.59	496.73	11.11	355.59	358.81		-0.0397059	0.0752941	-0.396765	-0.578824	0.429118	0.0161765
27	34.86	2.58	496.3	11.37	355.63	358.85		-0.119706	0.0652941	-0.826765	-0.318824	0.469118	0.0561765
28	34.69	2.57	492.97	11.22	356.87	359.03		-0.289706	0.0552941	-4.15676	-0.468824	1.70912	0.236176
29	34.72	2.25	495.63	11.86	355.87	358.83		-0.259706	-0.264706	-1.49676	0.171176	0.709118	0.0361765
30	34.57	2.19	493.13	12	353.73	358.75		-0.409706	-0.324706	-3.99676	0.311176	-1.43088	-0.0438235
31	35.43	2.79	503.87	12.3	354.95	358.59		0.450294	0.275294	6.74324	0.611176	-0.210882	-0.203824
32	34.51	2.57	492.93	11.64	355.99	359.13		-0.469706	0.0552941	-4.19676	-0.0488235	0.829118	0.336176
33	35.69	2.77	504.19	12.16	355.56	358.59		0.710294	0.255294	7.06324	0.471176	0.399118	-0.203824
34	34.91	2.39	497.26	12.02	354.68	359.07		-0.0697059	-0.124706	0.133235	0.331176	-0.480882	0.276176
Average	34.9797	2.51471	497.127	11.6888	355.161	358.794		-4.59763e-15	5.09396e-16	1.7889e-13	-2.61229e-15	-2.67498e-14	-7.35621e-14
SD	0.465842	0.305735	5.11044	0.501312	0.939753	0.243473		0.465842	0.305735	5.11044	0.501312	0.939753	0.243473

## Sheet: Composite Pose Upper Arch
Trial	X	Y	Z	Rot X	Rot Y	Rot Z	Normalized	X	Y	Z	Rot X	Rot Y	Rot Z
1	30.32	-42.35	544.86	20.67	354.54	1.3		-0.559118	0.878235	-5.18147	-0.317059	-1.06029	-0.507059
2	30.44	-42.76	547.49	20.65	354.76	1.5		-0.439118	0.468235	-2.55147	-0.337059	-0.840294	-0.307059
3	30.32	-42.48	545.03	20.76	354.87	1.36		-0.559118	0.748235	-5.01147	-0.227059	-0.730294	-0.447059
4	30.38	-42.41	545.13	20.58	355.01	1.48		-0.499118	0.818235	-4.91147	-0.407059	-0.590294	-0.327059
5	30.69	-42.83	546.88	20.77	356.15	2.02		-0.189118	0.398235	-3.16147	-0.217059	0.549706	0.212941
6	31.04	-43.37	548.28	21.32	356.4	1.96		0.160882	-0.141765	-1.76147	0.332941	0.799706	0.152941
7	30.83	-43.1	547.35	21.31	355.95	1.95		-0.0491176	0.128235	-2.69147	0.322941	0.349706	0.142941
8	31.19	-43.74	552.5	21.42	356.38	2.03		0.310882	-0.511765	2.45853	0.432941	0.779706	0.222941
9	31.15	-43.61	551.58	21.52	356.31	2.08		0.270882	-0.381765	1.53853	0.532941	0.709706	0.272941
10	31.13	-43.34	549.04	21.51	356.7	2.09		0.250882	-0.111765	-1.00147	0.522941	1.09971	0.282941
11	31.05	-43.69	550.8	21.53	356.37	2.22		0.170882	-0.461765	0.758529	0.542941	0.769706	0.412941
12	30.89	-43.44	549.72	21.23	355.88	2.02		0.0108824	-0.211765	-0.321471	0.242941	0.279706	0.212941
13	30.79	-43.32	549.27	21.27	355.62	1.97		-0.0891176	-0.0917647	-0.771471	0.282941	0.0197059	0.162941
14	30.81	-43.37	549.87	20.56	356.63	2.32		-0.0691176	-0.141765	-0.171471	-0.427059	1.02971	0.512941
15	31.24	-43.31	552.27	20.72	354.58	1.96	*	0.360882	-0.0817647	2.22853	-0.267059	-1.02029	0.152941
16	32.29	-44.33	563.35	22.03	353.29	0.93	*	1.41088	-1.10176	13.3085	1.04294	-2.31029	-0.877059
17	32.14	-45.3	568.92	21.78	355.25	1.13		1.26088	-2.07176	18.8785	0.792941	-0.350294	-0.677059
18	30.89	-42.27	550.91	21.21	353.44	1.29	*	0.0108824	0.958235	0.868529	0.222941	-2.16029	-0.517059
19	30.74	-43.64	550.36	21.08	354.4	1.3	*	-0.139118	-0.411765	0.318529	0.0929412	-1.20029	-0.507059
20	30.87	-43.73	548.42	20.68	355.58	1.77		-0.00911765	-0.501765	-1.62147	-0.307059	-0.0202941	-0.0370588
21	30.44	-42.74	546.28	20.62	355.01	1.61		-0.439118	0.488235	-3.76147	-0.367059	-0.590294	-0.197059
22	30.97	-42.21	550.16	20.1	356.61	2.2		0.0908824	1.01824	0.118529	-0.887059	1.00971	0.392941
23	30.61	-42.03	546.48	19.78	356.7	2.08		-0.269118	1.19824	-3.56147	-1.20706	1.09971	0.272941
24	30.28	-42.68	548.82	20.6	354.96	1.52		-0.599118	0.548235	-1.22147	-0.387059	-0.640294	-0.287059
25	30.75	-43.04	548.41	20.41	355.98	2.02		-0.129118	0.188235	-1.63147	-0.577059	0.379706	0.212941
26	30.87	-43.21	549.67	20.4	356.03	1.91		-0.00911765	0.0182353	-0.371471	-0.587059	0.429706	0.102941
27	30.84	-43.16	549.21	20.66	356.09	1.95		-0.0391176	0.0682353	-0.831471	-0.327059	0.489706	0.142941
28	30.71	-42.71	546	20.45	357.39	2.36		-0.169118	0.518235	-4.04147	-0.537059	1.78971	0.552941
29	30.63	-43.29	548.64	21.13	356.35	1.98		-0.249118	-0.0617647	-1.40147	0.142941	0.749706	0.172941
30	30.22	-42.79	546.17	21.35	354.08	1.47		-0.659118	0.438235	-3.87147	0.362941	-1.52029	-0.337059
31	31.33	-44.56	556.67	21.67	355.43	1.6		0.450882	-1.33176	6.62853	0.682941	-0.170294	-0.207059
32	30.62	-42.76	545.91	20.93	356.5	2.35		-0.259118	0.468235	-4.13147	-0.0570588	0.899706	0.542941
33	31.5	-44.43	556.89	21.47	356.04	1.68		0.620882	-1.20176	6.84853	0.482941	0.439706	-0.127059
34	30.92	-43.76	550.07	21.39	355.13	2.03		0.0408824	-0.531765	0.0285294	0.402941	-0.470294	0.222941
Average	30.8791	-43.2282	550.041	20.9871	355.6	1.80706		-1.05536e-14	6.06051e-15	1.4378e-13	2.61229e-15	3.00936e-14	-7.1838e-17
stdev	0.459574	0.722166	5.01104	0.510914	0.974258	0.36982		0.459574	0.722166	5.01104	0.510914	0.974258	0.36982

## Sheet: Pose Estimation Lower Arch
Trial\Pose	X	Y	Z	Rot X	Rot Y	Rot Z	Normalized	X	Y	Z	Rot X	Rot Y	Rot Z
1	31.61	-18.45	472.15	342.09	357.53	358.32		-0.822	0.122667	-4.34033	-0.337333	-0.960333	0.0473333
2	32.08	-18.68	472.65	341.93	357.89	358.38		-0.352	-0.107333	-3.84033	-0.497333	-0.600333	0.107333
3	31.77	-18.45	467.97	342.21	358.43	358.09		-0.662	0.122667	-8.52033	-0.217333	-0.0603333	-0.182667
4	31.85	-18.31	469.24	342.18	358.26	358.21		-0.582	0.262667	-7.25033	-0.247333	-0.230333	-0.0626667
5	32.05	-18.4	470.71	342.29	359.06	358.18		-0.382	0.172667	-5.78033	-0.137333	0.569667	-0.0926667
6	32.66	-18.72	477.22	342.29	358.46	358.15		0.228	-0.147333	0.729667	-0.137333	-0.0303333	-0.122667
7	32.88	-18.75	477.63	342.62	358.09	358.38		0.448	-0.177333	1.13967	0.192667	-0.400333	0.107333
8	33.15	-18.96	482.58	342.71	357.99	358.31		0.718	-0.387333	6.08967	0.282667	-0.500333	0.0373333
9	33.21	-19.07	483.42	343.02	358.17	358.17		0.778	-0.497333	6.92967	0.592667	-0.320333	-0.102667
10	32.97	-18.97	480.86	342.92	358.69	358.19		0.538	-0.397333	4.36967	0.492667	0.199667	-0.0826667
11	32.96	-18.87	479.74	342.85	358.18	358.23		0.528	-0.297333	3.24967	0.422667	-0.310333	-0.0426667
12	32.76	-18.7	479.45	342.61	357.95	358.25		0.328	-0.127333	2.95967	0.182667	-0.540333	-0.0226667
13	32.76	-18.86	477.88	342.74	357.97	358.21		0.328	-0.287333	1.38967	0.312667	-0.520333	-0.0626667
14	32.33	-18.54	476.54	342.78	359.85	358.04		-0.102	0.0326667	0.0496667	0.352667	1.35967	-0.232667
15							*
16							*
17	32.79	-17.82	478.03	342.23	359.47	357.78		0.358	0.752667	1.53967	-0.197333	0.979667	-0.492667
18							*
19							*
20	32.24	-18.54	474.47	341.98	358.15	358.51		-0.192	0.0326667	-2.02033	-0.447333	-0.340333	0.237333
21	32.36	-18.72	475.52	341.58	357.11	358.95		-0.072	-0.147333	-0.970333	-0.847333	-1.38033	0.677333
22	32.53	-18.9	479.72	342.04	358.56	358.49		0.098	-0.327333	3.22967	-0.387333	0.0696667	0.217333
23	31.67	-18.11	470.51	341.9	359.34	358.21		-0.762	0.462667	-5.98033	-0.527333	0.849667	-0.0626667
24	31.89	-17.88	470.89	342.57	359.76	358.14		-0.542	0.692667	-5.60033	0.142667	1.26967	-0.132667
25	31.66	-18.03	468.92	342.21	359.15	358.17		-0.772	0.542667	-7.57033	-0.217333	0.659667	-0.102667
26	32.14	-18.48	474.52	342.08	359.06	358.25		-0.292	0.0926667	-1.97033	-0.347333	0.569667	-0.0226667
27	32.13	-18.24	474.61	342.31	359.17	358.42		-0.302	0.332667	-1.88033	-0.117333	0.679667	0.147333
28	31.58	-18.14	469.37	342.33	360.24	358.17		-0.852	0.432667	-7.12033	-0.0973333	1.74967	-0.102667
29	32.77	-19.02	482.13	342.2	358.27	358.51		0.338	-0.447333	5.63967	-0.227333	-0.220333	0.237333
30	32.53	-18.65	477.04	342.33	357.31	358.28		0.098	-0.0773333	0.549667	-0.0973333	-1.18033	0.00733333
31	33.05	-18.82	483.92	343.25	358.86	358.24		0.618	-0.247333	7.42967	0.822667	0.369667	-0.0326667
32	32.6	-18.65	480.69	342.44	358.74	358.28		0.168	-0.0773333	4.19967	0.0126667	0.249667	0.00733333
33	32.91	-18.5	481.8	343.04	358.29	358.18		0.478	0.0726667	5.30967	0.612667	-0.200333	-0.0926667
34	33.07	-18.95	484.53	343.09	356.71	358.49		0.638	-0.377333	8.03967	0.662667	-1.78033	0.217333
Average	32.432	-18.5727	476.49	342.427	358.49	358.273		4.73695e-15	4.02641e-15	-1.89478e-14	-3.41061e-14	-2.08426e-14	-7.38964e-14
SD	0.512327	0.339837	4.97441	0.406905	0.813225	0.199014		0.512327	0.339837	4.97441	0.406905	0.813225	0.199014

## Sheet: Composite Pose Lower Arch
Trial	X	Y	Z	Rot X	Rot Y	Rot Z	Normalized	X	Y	Z	Rot X	Rot Y	Rot Z
1	28.81	-59.9	522.14	351.28	356.37	1.53		-0.862667	1.04733	-4.20633	-0.312	-0.945	-0.114667
2	29.24	-60.07	522.59	351.1	356.7	1.63		-0.432667	0.877333	-3.75633	-0.492	-0.615	-0.0146667
3	28.86	-59.26	518.04	351.35	357.24	1.42		-0.812667	1.68733	-8.30633	-0.242	-0.075	-0.224667
4	28.93	-59.46	519.28	351.34	357.08	1.5		-0.742667	1.48733	-7.06633	-0.252	-0.235	-0.144667
5	29.24	-59.84	520.75	351.41	357.86	1.62		-0.432667	1.10733	-5.59633	-0.182	0.545	-0.0246667
6	29.8	-61.2	527.13	351.45	357.28	1.48		0.127333	-0.252667	0.783667	-0.142	-0.035	-0.164667
7	29.97	-61.29	527.58	351.8	356.95	1.65		0.297333	-0.342667	1.23367	0.208	-0.365	0.00533333
8	30.29	-62.23	532.45	351.89	356.85	1.56		0.617333	-1.28267	6.10367	0.298	-0.465	-0.0846667
9	30.32	-62.43	533.2	352.19	357.04	1.44		0.647333	-1.48267	6.85367	0.598	-0.275	-0.204667
10	30.11	-62	530.65	352.07	357.54	1.55		0.437333	-1.05267	4.30367	0.478	0.225	-0.0946667
11	30.11	-61.78	529.58	352.03	357.05	1.51		0.437333	-0.832667	3.23367	0.438	-0.265	-0.134667
12	29.92	-61.61	529.33	351.81	356.81	1.5		0.247333	-0.662667	2.98367	0.218	-0.505	-0.144667
13	29.86	-61.35	527.68	351.92	356.83	1.47		0.187333	-0.402667	1.33367	0.328	-0.485	-0.174667
14	29.66	-61.05	526.3	351.88	358.65	1.64		-0.0126667	-0.102667	-0.0463333	0.288	1.335	-0.00466667
15							*
16							*
17	29.78	-60.1	527.81	351.28	358.25	1.25		0.107333	0.847333	1.46367	-0.312	0.935	-0.394667
18							*
19							*
20	29.67	-61.33	524.13	351.27	356.96	1.88		-0.00266667	-0.382667	-2.21633	-0.322	-0.355	0.235333
21	29.7	-60.77	525.45	350.82	355.94	2.14		0.0273333	0.177333	-0.896333	-0.772	-1.375	0.495333
22	29.95	-60.95	529.54	351.13	357.36	1.93		0.277333	-0.00266667	3.19367	-0.462	0.045	0.285333
23	29.01	-59.23	520.47	350.98	358.09	1.76		-0.662667	1.71733	-5.87633	-0.612	0.775	0.115333
24	29.21	-59.53	520.67	351.67	358.53	1.73		-0.462667	1.41733	-5.67633	0.078	1.215	0.0853333
25	29.08	-59.51	518.86	351.37	357.93	1.69		-0.592667	1.43733	-7.48633	-0.222	0.615	0.0453333
26	29.46	-60.66	524.41	351.22	357.84	1.75		-0.212667	0.287333	-1.93633	-0.372	0.525	0.105333
27	29.49	-60.44	524.5	351.45	357.97	1.93		-0.182667	0.507333	-1.84633	-0.142	0.655	0.285333
28	28.99	-59.6	519.41	351.42	359	1.87		-0.682667	1.34733	-6.93633	-0.172	1.685	0.225333
29	30.07	-62.26	531.94	351.38	357.09	1.87		0.397333	-1.31267	5.59367	-0.212	-0.225	0.225333
30	29.54	-60.93	526.99	351.54	356.17	1.43		-0.132667	0.0173333	0.643667	-0.052	-1.145	-0.214667
31	30.39	-62.86	533.54	352.44	357.72	1.71		0.717333	-1.91267	7.19367	0.848	0.405	0.0653333
32	30.11	-61.86	530.46	351.62	357.56	1.77		0.437333	-0.912667	4.11367	0.028	0.245	0.125333
33	30.14	-62.03	531.4	352.25	357.15	1.53		0.467333	-1.08267	5.05367	0.658	-0.165	-0.114667
34	30.47	-62.89	534.11	352.4	355.64	1.6		0.797333	-1.94267	7.76367	0.808	-1.675	-0.0446667
Average	29.6727	-60.9473	526.346	351.592	357.315	1.64467		-8.76336e-15	-2.36848e-16	-7.20017e-14	1.51582e-14	1.13687e-13	1.62833e-16
stdev	0.494382	1.11148	4.87919	0.421192	0.78255	0.192618		0.494382	1.11148	4.87919	0.421192	0.78255	0.192618
